# Supplementary material for: Heterogeneity and longevity of antibody memory to viruses and vaccines
Source: PLOS journal article supplement (doi:10.1371/journal.pbio.2006601), 2018-08-10
Supplement: S4 (10.1371/journal.pbio.2006601.s004) [file journal.pbio.2006601.s004]

| Level or Factor         | Random Effect | SD                                 | Corr. $r$                        |
|-------------------------|---------------|------------------------------------|----------------------------------|
| vaccine                 | magnitude     | 0.760<br>$\Delta\text{AIC}=220.7$  | 0.83<br>$\Delta\text{AIC}=2.4$   |
|                         | decay rate    | 0.00961<br>$\Delta\text{AIC}=93.9$ |                                  |
| individual              | magnitude     | 0.200<br>$\Delta\text{AIC}= 24.5$  | -0.86<br>$\Delta\text{AIC}= 5.8$ |
|                         | decay rate    | 0.00376<br>$\Delta\text{AIC}= 8.1$ |                                  |
| vaccine $\times$ indiv. | magnitude     | 0.385<br>$\Delta\text{AIC}= 11283$ | 0.07<br>$\Delta\text{AIC}= -1.5$ |
|                         | decay rate    | 0.0103<br>$\Delta\text{AIC}=763$   |                                  |
| residual                |               | 0.0466                             |                                  |
